# Supplementary material for: Revealing the semiconductor–catalyst interface in buried platinum black silicon photocathodes
Source: Royal Society of Chemistry journal article supplement (doi:10.1039/c6ta02505f), 2016-01-01
Supplement: c6ta02505f1.pdf [file c6ta02505f1.pdf]

Supporting Information for:

## Revealing the Semiconductor-Catalyst Interface in Buried Platinum Black Silicon Photocathodes

Jeffery A. Aguiar,<sup>†a</sup> Nicholas C. Anderson,<sup>†a</sup> and Nathan R. Neale<sup>\*a</sup>

<sup>a</sup> National Renewable Energy Laboratory, Golden, CO 80220 USA. E-mail: Nathan.Neale@nrel.gov

<sup>†</sup> These authors contributed equally to this work.

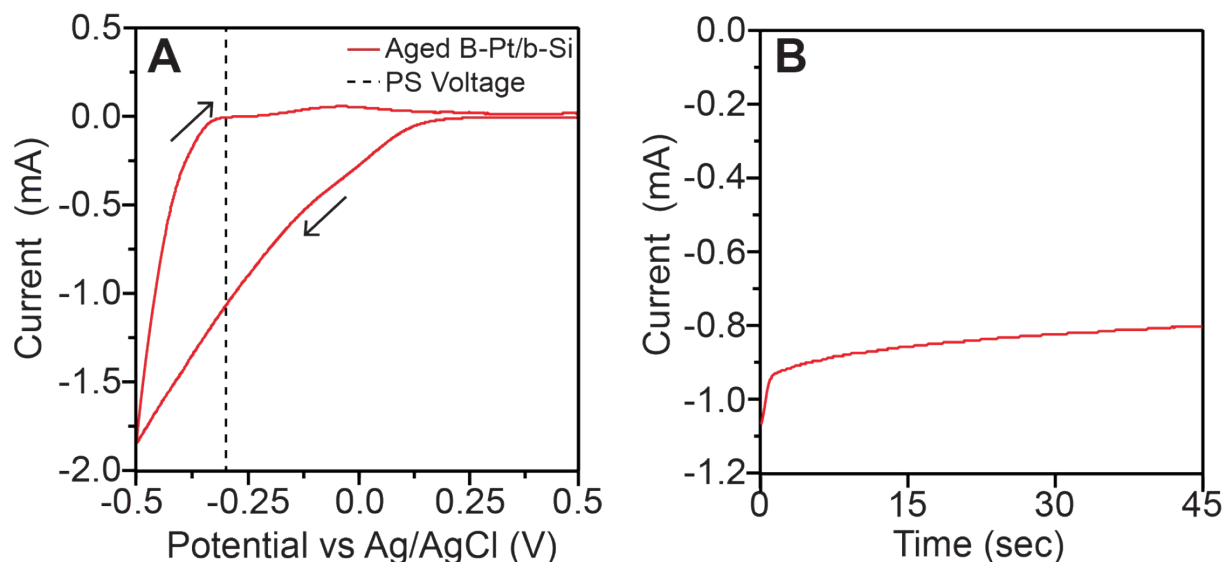

**Figure S1.** (A) Cyclic voltammetry curve, swept from positive to negative potential and then the reverse as indicated by the arrows and (B) potentiostatic deposition vs time for 1 month air-aged B-Pt/b-Si electrodes in 5 mM CuSO<sub>4</sub> and 50 mM H<sub>2</sub>SO<sub>4</sub> with a Pt counter electrode vs Ag/AgCl (3.0 M) reference electrode under illumination. Dashed line shows potential for potentiostatic Cu deposition (-0.3 V vs Ag/AgCl).
